# Supplementary material for: Molecular Survey of Vector-Borne Pathogens in Ticks, Sheep Keds, and Domestic Animals from Ngawa, Southwest China
Source: MDPI journal article supplement (doi:10.3390/pathogens11050606), 2022-05-22
Supplement: s1 [file s1]

Table S1. Nucleotide identity of 16S, *gltA*, and *groEL* genes of *Anaplasma bovis* strains to reported strains in the Genbank database.

|                                | 16S                                                      | <i>gltA</i>                                         | <i>groEL</i>                                             |
|--------------------------------|----------------------------------------------------------|-----------------------------------------------------|----------------------------------------------------------|
| <i>Anaplasma bovis</i> goat6   | 100%<br><i>Anaplasma bovis</i> isolate Zhouzhi-goat-29   | 92.23%<br>Uncultured <i>Anaplasma</i> sp. clone 499 | 96.49%<br><i>Anaplasma bovis</i> isolate Zhouzhi-goat-29 |
| <i>Anaplasma bovis</i> goat8   | 100%<br><i>Anaplasma bovis</i> isolate Zhouzhi-goat-29   | 92.37%<br>Uncultured <i>Anaplasma</i> sp. clone 499 | 95.54%<br><i>Anaplasma bovis</i> isolate Zhouzhi-goat-29 |
| <i>Anaplasma bovis</i> goat9   | 100%<br><i>Anaplasma bovis</i> isolate Zhouzhi-goat-29   | 92.23%<br>Uncultured <i>Anaplasma</i> sp. clone 499 | 96.49%<br><i>Anaplasma bovis</i> isolate Zhouzhi-goat-29 |
| <i>Anaplasma bovis</i> goat10  | 99.32%<br><i>Anaplasma bovis</i> isolate Zhouzhi-goat-29 | 92.48%<br>Uncultured <i>Anaplasma</i> sp. clone 499 | 95.54%<br><i>Anaplasma bovis</i> isolate Zhouzhi-goat-29 |
| <i>Anaplasma bovis</i> yak30   | 99.21%<br><i>Anaplasma bovis</i> isolate Zhouzhi-goat-29 | 92.74%<br>Uncultured <i>Anaplasma</i> sp. clone 499 | 95.68%<br><i>Anaplasma bovis</i> isolate Zhouzhi-goat-29 |
| <i>Anaplasma bovis</i> yak33   | 100%<br><i>Anaplasma bovis</i> isolate Zhouzhi-goat-29   | 92.74%<br>Uncultured <i>Anaplasma</i> sp. clone 499 | 95.81%<br><i>Anaplasma bovis</i> isolate Zhouzhi-goat-29 |
| <i>Anaplasma bovis</i> yak64   | 99.77%<br><i>Anaplasma bovis</i> isolate Zhouzhi-goat-29 | 92.74%<br>Uncultured <i>Anaplasma</i> sp. clone 499 | 95.81%<br><i>Anaplasma bovis</i> isolate Zhouzhi-goat-29 |
| <i>Anaplasma bovis</i> yak67   | 99.89%<br><i>Anaplasma bovis</i> isolate Zhouzhi-goat-29 | 92.23%<br>Uncultured <i>Anaplasma</i> sp. clone 499 | 95.81%<br><i>Anaplasma bovis</i> isolate Zhouzhi-goat-29 |
| <i>Anaplasma bovis</i> tick103 | 100%<br><i>Anaplasma bovis</i> isolate Zhouzhi-goat-29   | 92.48%<br>Uncultured <i>Anaplasma</i> sp. clone 499 | 96.49%<br><i>Anaplasma bovis</i> isolate Zhouzhi-goat-29 |
