# Supplementary material for: Molecular Survey of Vector-Borne Pathogens in Ticks, Sheep Keds, and Domestic Animals from Ngawa, Southwest China
Source: MDPI journal article supplement (doi:10.3390/pathogens11050606), 2022-05-22
Supplement: s1 [file s1]

Table S4 Genbank numbers of *Rickettsia*, *Anaplasma*, and *Coxiella* sequences obtained in this study.

|    | Gene         | Genbank numbers | Bacterial strain                                  |
|----|--------------|-----------------|---------------------------------------------------|
| 1  | 16S          | OK560068        | <i>Anaplasma_bovis_yak64</i>                      |
| 2  | 16S          | OK560069        | <i>Anaplasma_bovis_yak33</i>                      |
| 3  | 16S          | OK560070        | <i>Anaplasma_bovis_yak67</i>                      |
| 4  | 16S          | OK560071        | <i>Anaplasma_bovis_yak30</i>                      |
| 5  | 16S          | OK560072        | <i>Anaplasma_bovis_goat6</i>                      |
| 6  | 16S          | OK560073        | <i>Anaplasma_bovis_goat8</i>                      |
| 7  | 16S          | OK560074        | <i>Anaplasma_bovis_goat9</i>                      |
| 8  | 16S          | OK560075        | <i>Anaplasma_bovis_goat10</i>                     |
| 9  | 16S          | OK560076        | <i>Anaplasma_bovis_tick103</i>                    |
| 10 | 16S          | OK560101        | <i>Coxiella-like_bacterium_goat12</i>             |
| 11 | 16S          | OK560102        | <i>Coxiella_sp._tick8</i>                         |
| 12 | 16S          | OK560103        | <i>Coxiella_sp._tick103</i>                       |
| 13 | 16S          | OK560104        | <i>Coxiella_sp._tick166</i>                       |
| 14 | 16S          | OK560105        | <i>Coxiella_sp._yak17</i>                         |
| 15 | 16S          | OK662394        | <i>Candidatus_Rickettsia_jingxinensis_tick26</i>  |
| 16 | 16S          | OK662393        | <i>Candidatus_Rickettsia_jingxinensis_tick28</i>  |
| 17 | 16S          | OK662395        | <i>Candidatus_Rickettsia_hongyuanensis_tick61</i> |
| 18 | 16S          | OK662396        | <i>Rickettsia_sp._tick14</i>                      |
| 19 | <i>gltA</i>  | OK625713        | <i>Anaplasma_bovis_goat6</i>                      |
| 20 | <i>gltA</i>  | OK625714        | <i>Anaplasma_bovis_goat8</i>                      |
| 21 | <i>gltA</i>  | OK625715        | <i>Anaplasma_bovis_goat9</i>                      |
| 22 | <i>gltA</i>  | OK625716        | <i>Anaplasma_bovis_goat10</i>                     |
| 23 | <i>gltA</i>  | OK625717        | <i>Anaplasma_bovis_tick103</i>                    |
| 24 | <i>gltA</i>  | OK625718        | <i>Anaplasma_bovis_yak30</i>                      |
| 25 | <i>gltA</i>  | OK625719        | <i>Anaplasma_bovis_yak33</i>                      |
| 26 | <i>gltA</i>  | OK625720        | <i>Anaplasma_bovis_yak64</i>                      |
| 27 | <i>gltA</i>  | OK625721        | <i>Anaplasma_bovis_yak67</i>                      |
| 28 | <i>gltA</i>  | OK625736        | <i>Candidatus_Rickettsia_jingxinensis_tick26</i>  |
| 29 | <i>gltA</i>  | OK625737        | <i>Candidatus_Rickettsia_jingxinensis_tick28</i>  |
| 30 | <i>gltA</i>  | OK625738        | <i>Candidatus_Rickettsia_hongyuanensis_tick61</i> |
| 31 | <i>groEL</i> | OK625722        | <i>Anaplasma_bovis_goat6</i>                      |
| 32 | <i>groEL</i> | OK625723        | <i>Anaplasma_bovis_goat8</i>                      |
| 33 | <i>groEL</i> | OK625724        | <i>Anaplasma_bovis_goat9</i>                      |
| 34 | <i>groEL</i> | OK625725        | <i>Anaplasma_bovis_goat10</i>                     |
| 35 | <i>groEL</i> | OK625726        | <i>Anaplasma_bovis_yak30</i>                      |
| 36 | <i>groEL</i> | OK625727        | <i>Anaplasma_bovis_yak33</i>                      |
| 37 | <i>groEL</i> | OK625728        | <i>Anaplasma_bovis_yak64</i>                      |
| 38 | <i>groEL</i> | OK625729        | <i>Anaplasma_bovis_yak67</i>                      |

|    |              |          |                                                   |
|----|--------------|----------|---------------------------------------------------|
| 39 | <i>groEL</i> | OK625730 | <i>Anaplasma_bovis_tick103</i>                    |
| 40 | <i>groEL</i> | ON409664 | <i>Candidatus_Rickettsia_jingxinensis_tick26</i>  |
| 41 | <i>groEL</i> | ON409665 | <i>Candidatus_Rickettsia_jingxinensis_tick28</i>  |
| 42 | <i>groEL</i> | ON409666 | <i>Candidatus_Rickettsia_hongyuanensis_tick61</i> |
| 43 | <i>groEL</i> | ON409663 | <i>Rickettsia_sp._tick14</i>                      |
| 44 | <i>groEL</i> | OK625731 | <i>Coxiella_sp._tick103</i>                       |
| 45 | <i>groEL</i> | OK625732 | <i>Coxiella_sp._tick166</i>                       |
| 46 | <i>rpoB</i>  | OK625733 | <i>Coxiella_sp._tick8</i>                         |
| 47 | <i>rpoB</i>  | OK625734 | <i>Coxiella_sp._tick103</i>                       |
| 48 | <i>rpoB</i>  | OK625735 | <i>Coxiella_sp._tick166</i>                       |
| 49 | <i>ompA</i>  | OL335946 | <i>Candidatus_Rickettsia_jingxinensis_tick26</i>  |
| 50 | <i>ompA</i>  | OL335947 | <i>Candidatus_Rickettsia_jingxinensis_tick28</i>  |
| 51 | <i>ompA</i>  | OL335948 | <i>Candidatus_Rickettsia_hongyuanensis_tick61</i> |
| 52 | <i>htrA</i>  | OM802186 | <i>Candidatus_Rickettsia_hongyuanensis_tick61</i> |
| 53 | <i>htrA</i>  | OM802187 | <i>Candidatus_Rickettsia_jingxinensis_tick26</i>  |
| 54 | <i>ompB</i>  | OM802188 | <i>Candidatus_Rickettsia_hongyuanensis_tick61</i> |
| 55 | <i>ompB</i>  | OM802189 | <i>Candidatus_Rickettsia_jingxinensis_tick26</i>  |
| 56 | <i>ompB</i>  | OM802190 | <i>Candidatus_Rickettsia_jingxinensis_tick28</i>  |

---
