# Supplementary material for: Molecular Survey of Vector-Borne Pathogens in Ticks, Sheep Keds, and Domestic Animals from Ngawa, Southwest China
Source: MDPI journal article supplement (doi:10.3390/pathogens11050606), 2022-05-22
Supplement: s1 [file s1]

Table S2. Nucleotide identity of 16S, *gltA*, *groEL*, *ompA*, *ompB*, and *htrA* genes of *Rickettsia* strains to reported strains in the Genbank database.

|                                            | 16S                                                                     | <i>gltA</i>                                                    | <i>groEL</i>                                                                                  | <i>ompA</i>                                               | <i>ompB</i>                                              | <i>htrA</i>                                         |
|--------------------------------------------|-------------------------------------------------------------------------|----------------------------------------------------------------|-----------------------------------------------------------------------------------------------|-----------------------------------------------------------|----------------------------------------------------------|-----------------------------------------------------|
| <i>Ca. Rickettsia hongyuanensis</i> tick61 | 100%<br>uncultured <i>Rickettsia</i> sp.<br>Hja 192                     | 99.90%<br><i>Ca. Rickettsia principis</i><br>str. douglasi 061 | 98.77%<br><i>Rickettsia peacockii</i> str.<br>Rustic                                          | 99.83%<br>Uncultured <i>Rickettsia</i><br>sp. clone Y27-1 | 97.07%<br><i>Ca. Rickettsia</i><br>tasmanensis str. T152 | 99.76%<br>Uncultured<br><i>Rickettsia</i> sp. Hf_01 |
| <i>Ca. Rickettsia jingxinensis</i> tick26  | 99.92%<br><i>Ca. Rickettsia</i><br>jingxinensis                         | 100%<br><i>Ca. Rickettsia</i><br>jingxinensis                  | 99.05%<br><i>Rickettsia</i><br>heilongjiangensis                                              | 100%<br><i>Ca. Rickettsia</i><br>jingxinensis             | 99.20%<br><i>Rickettsia</i> sp. strain<br>Koreansis      | 99.76%<br><i>Ca. Rickettsia</i><br>jingxinensis     |
| <i>Ca. Rickettsia jingxinensis</i> tick28  | 99.92%<br><i>Ca. Rickettsia</i><br>jingxinensis                         | 100%<br><i>Ca. Rickettsia</i><br>jingxinensis                  | 99.05%<br><i>Rickettsia</i><br>heilongjiangensis                                              | 100%<br><i>Ca. Rickettsia</i><br>jingxinensis             | 98.94%<br><i>Rickettsia</i> sp. strain<br>Koreansis      | NA                                                  |
| <i>Rickettsia</i> sp.<br>tick14            | 99.83%<br>Uncultured<br><i>Rickettsiales</i> bacterium<br>clone LG127_1 | NA                                                             | 99.54%<br><i>Rickettsia</i> endosymbiont<br>of <i>Polydesmus</i><br><i>complanatus</i> Bel-53 | NA                                                        | NA                                                       | NA                                                  |
