# Supplementary material for: Molecular Survey of Vector-Borne Pathogens in Ticks, Sheep Keds, and Domestic Animals from Ngawa, Southwest China
Source: MDPI journal article supplement (doi:10.3390/pathogens11050606), 2022-05-22
Supplement: s1 [file s1]

Table S3. Nucleotide identity of 16S, *groEL* and *rpoB* genes of *Coxiella* strains to reported strains in the Genbank database.

|                                        | 16S                                                                      | <i>groEL</i>                                | <i>rpoB</i>                                                              |
|----------------------------------------|--------------------------------------------------------------------------|---------------------------------------------|--------------------------------------------------------------------------|
| <i>Coxiella</i> sp. yak17              | 99.32%<br><i>Coxiella</i> sp. isolate XinXian-HL9                        | NA                                          | NA                                                                       |
| <i>Coxiella</i> sp. tick103            | 99.32%<br><i>Coxiella</i> sp. isolate XinXian-HL9                        | 91.56%<br><i>Coxiella</i> sp. isolate DR275 | 86.96%<br><i>Coxiella</i> sp. strain CoxAsp                              |
| <i>Coxiella</i> sp. tick166            | 99.24%<br><i>Coxiella</i> sp. isolate XinXian-HL9                        | 91.56%<br><i>Coxiella</i> sp. isolate DR275 | 86.96%<br><i>Coxiella</i> sp. strain CoxAsp                              |
| <i>Coxiella</i> sp. tick8              | 99.32%<br><i>Coxiella</i> endosymbiont of <i>Rhipicephalus turanicus</i> | NA                                          | 99.51%<br><i>Coxiella</i> endosymbiont of <i>Rhipicephalus turanicus</i> |
| <i>Coxiella</i> -like bacterium goat12 | 96.77%<br><i>Coxiella burnetii</i>                                       | NA                                          | NA                                                                       |
