# Supplementary material for: Molecular Survey of Vector-Borne Pathogens in Ticks, Sheep Keds, and Domestic Animals from Ngawa, Southwest China
Source: MDPI journal article supplement (doi:10.3390/pathogens11050606), 2022-05-22
Supplement: s1 [file s1]

Table S5 The primers used for amplification of 16S, *gltA*, *groEL*, *htrA*, *ompA*, *ompB*, *rpoB*, and *COI* genes from *Rickettsia*, *Anaplasma*, *Coxiella* and hosts by PCR.

| Primer     | Cycle | Bacteria/Host     | Gene        | annealing<br>temperature | Sequence                   | Anticipated<br>amplicon length | Reference                                |
|------------|-------|-------------------|-------------|--------------------------|----------------------------|--------------------------------|------------------------------------------|
| Ana-F      | 1, 2  | <i>Anaplasma</i>  | 16S         | 52°C                     | 5-GATAGCCACTRGAAGTG GT-3   | 900 bp                         | Lu et al., 2022<br>(for detection)       |
| Ana-R1     | 1     | <i>Anaplasma</i>  | 16S         | 52°C                     | 5-CGTGCTGACTTGACATCAT-3    |                                |                                          |
| Ana-R2     | 2     | <i>Anaplasma</i>  | 16S         | 52°C                     | 5-CATCTCACGACACGAGCTG-3    |                                |                                          |
| Ric-F      | 1, 2  | <i>Rickettsia</i> | 16S         | 50°C                     | 5-YTACGGAATAACTTTTAGAAA-3  | 900 bp                         | Lu et al., 2022<br>(for detection)       |
| Ric-R1     | 1     | <i>Rickettsia</i> | 16S         | 50°C                     | 5-CATGATGACTTGACRTC GT-3   |                                |                                          |
| Ric-R2     | 2     | <i>Rickettsia</i> | 16S         | 50°C                     | 5-CATCTCACGACACGAGCTG-3    |                                |                                          |
| Cox-R      | 1, 2  | <i>Coxiella</i>   | 16S         | 52°C                     | 5-ACTYYCCAACAGCTAGTTCTCA-3 | 600 bp                         | Duron et al.,<br>2015<br>(for detection) |
| Cox-F1     | 1     | <i>Coxiella</i>   | 16S         | 52°C                     | 5-GTAGGAATCTACCTTRTAGWGG-3 |                                |                                          |
| Cox-F2     | 2     | <i>Coxiella</i>   | 16S         | 52°C                     | 5-TGAGAACTAGCTGTTGGRGAGT-3 |                                |                                          |
| Ric-glt-F1 | 1     | <i>Rickettsia</i> | <i>gltA</i> | 52°C                     | 5-ACTTAYGAYCCGGGCTTTAT-3   | 1100 bp                        | Lu et al., 2022                          |
| Ric-glt-F2 | 2     | <i>Rickettsia</i> | <i>gltA</i> | 52°C                     | 5-CTTTATGTCTACTGCTTCTTG-3  |                                |                                          |
| Ric-glt-R  | 1, 2  | <i>Rickettsia</i> | <i>gltA</i> | 52°C                     | 5-AGCTGTCTAGGTCTGCTGATT-3  |                                |                                          |

|             |      |                   |              |      |                                |         |                       |
|-------------|------|-------------------|--------------|------|--------------------------------|---------|-----------------------|
| Ric-gro-F1  | 1    | <i>Rickettsia</i> | <i>groEL</i> | 52°C | 5-CCATTACATGATAGAATTGCAA-3     | 800 bp  | Lu et al., 2022       |
| Ric-gro-F2  | 2    | <i>Rickettsia</i> | <i>groEL</i> | 52°C | 5-GAATTGCAATAAAGCCTATCG-3      |         |                       |
| Ric-gro-R   | 1, 2 | <i>Rickettsia</i> | <i>groEL</i> | 52°C | 5-CCATCATTGCTTTTCTTCTATC-3     |         |                       |
| Ana-glt-F1  | 1    | <i>Anaplasma</i>  | <i>gltA</i>  | 50°C | 5-CATCCNATGGCTATTYTCAT-3       | 900 bp  | Lu et al., 2022       |
| Ana-glt-R1  | 1    | <i>Anaplasma</i>  | <i>gltA</i>  | 50°C | 5-ACTATACCKGAGTAAAAGTC-3       |         |                       |
| Ana-glt-F2  | 2    | <i>Anaplasma</i>  | <i>gltA</i>  | 50°C | 5-GAYCACGARCARAATGCTTC-3       |         |                       |
| Ana-glt-R2  | 2    | <i>Anaplasma</i>  | <i>gltA</i>  | 50°C | 5-GAGTAAAAGTCGACRTTKGG-3       |         |                       |
| Ana-gro-F1  | 1    | <i>Anaplasma</i>  | <i>groEL</i> | 54°C | 5-GYCAGTGGGCTGGTAATGAA-3       | 1200 bp | Lu et al., 2022       |
| Ana-gro-R1  | 1    | <i>Anaplasma</i>  | <i>groEL</i> | 54°C | 5-CCWCCTGGTACWACACCTTC-3       |         |                       |
| Ana-gro-F2  | 2    | <i>Anaplasma</i>  | <i>groEL</i> | 52°C | 5-ATAGTYATGAAGGAGAGTGAT-3      |         |                       |
| Ana-gro-R2  | 2    | <i>Anaplasma</i>  | <i>groEL</i> | 52°C | 5-TCAACAGCAGCTCTAGTWG-3        |         |                       |
| Cox-rpoB-F1 | 1    | <i>Coxiella</i>   | <i>rpoB</i>  | 56°C | 5-GGGCGRCAYGGWAAGAAAGGSGT-3    | 550 bp  | Duron et al.,<br>2015 |
| Cox-rpoB-R1 | 1    | <i>Coxiella</i>   | <i>rpoB</i>  | 56°C | 5-CACCRAACCGTTGACCRCCAAATTG-3  |         |                       |
| Cox-rpoB-F2 | 2    | <i>Coxiella</i>   | <i>rpoB</i>  | 56°C | 5-TCGAAGACATGCCYTATTTAGAAG-3   |         |                       |
| Cox-rpoB-R2 | 2    | <i>Coxiella</i>   | <i>rpoB</i>  | 56°C | 5-AGCTTTCCCACCGARGGGTTGCTG-3   |         |                       |
| Cox-gro-F1  | 1    | <i>Coxiella</i>   | <i>groEL</i> | 56°C | 5-TTTGAAAAYATGGGCGCKCAAATGGT-3 | 600 bp  | Duron et al.,<br>2015 |
| Cox-gro-F2  | 2    | <i>Coxiella</i>   | <i>groEL</i> | 56°C | 5-GAAGTGGCTTCGCRTACWTCAGACG-3  |         |                       |

|             |      |                               |              |       |                                 |        |                        |
|-------------|------|-------------------------------|--------------|-------|---------------------------------|--------|------------------------|
| Cox-gro-R1  | 1    | <i>Coxiella</i>               | <i>groEL</i> | 56°C  | 5-CCAAACCCAGGTGCTTTYAC-3        | 400 bp | This study             |
| Cox-gro-R2  | 2    | <i>Coxiella</i>               | <i>groEL</i> | 56°C  | 5-CGRTC GCCAAAGCCAGGTGC-3       |        |                        |
| QD8rpoBin5  | 1, 2 | <i>Coxiella</i> -str.tick8    | <i>rpoB</i>  | 51 °C | 5-GAYWTCGTRCTWAA YCCYT TAGG-3   |        |                        |
| QD8rpoBmid3 | 1    | <i>Coxiella</i> -str.tick8    | <i>rpoB</i>  | 51°C  | 5-AWCCYGTGGARCGMGC GTGCAT-3     |        |                        |
| QD8rpoBin3  | 2    | <i>Coxiella</i> -str.tick8    | <i>rpoB</i>  | 51°C  | 5-TCATCTACTARRTGRTTAAGCTT-3     |        |                        |
| QR14ELex5   | 1    | <i>Rickettsia</i> -str.tick14 | <i>groEL</i> | 52°C  | 5-ARRCACGGYTCARAWGCWCGT-3       | 650 bp | This study             |
| QR14gELin5  | 2    | <i>Rickettsia</i> -str.tick14 | <i>groEL</i> | 52°C  | 5-ATRC CGTAAARGTTACWTTAGG-3     |        |                        |
| QR14groEL3  | 1, 2 | <i>Rickettsia</i> -str.tick14 | <i>groEL</i> | 52°C  | 5-CCACCACGTAATYTATTKACYAC-3     |        |                        |
| htrAex5     | 1    | <i>Rickettsia</i>             | <i>htrA</i>  | 53°C  | 5-GCTTTACAAAATTCTAAAAACCATATA-3 | 400 bp | Borsoi et al.,<br>2019 |
| htrAex3     | 1    | <i>Rickettsia</i>             | <i>htrA</i>  | 53°C  | 5-TGTCTATCAATTCACA ACTTGC-3     |        |                        |
| htrAin5     | 2    | <i>Rickettsia</i>             | <i>htrA</i>  | 48°C  | 5-GCTCTTGCAACTTCTATGT-3         |        |                        |
| htrAin5     | 2    | <i>Rickettsia</i>             | <i>htrA</i>  | 48°C  | 5-CATTGTTCGTCAGGTTGGC-3         |        |                        |
| ompBex5     | 1    | <i>Rickettsia</i>             | <i>ompB</i>  | 54°C  | 5-GTAACCGGAAGTAATCGTTTCGTAA-3   | 400 bp | Borsoi et al.,<br>2019 |
| ompBex3     | 1    | <i>Rickettsia</i>             | <i>ompB</i>  | 54°C  | 5-CTTTATAACCAGCTAAACCAC-3       |        |                        |
| ompBin5     | 2    | <i>Rickettsia</i>             | <i>ompB</i>  | 51°C  | 5-GTTTAATACGTGCTGCTAACCA-3      |        |                        |
| ompBin3     | 2    | <i>Rickettsia</i>             | <i>ompB</i>  | 51°C  | 5-GGTTTGGCCCATATACCATAA-3       |        |                        |
| LCO1490     | 1    | arthropods                    | <i>COI</i>   | 52°C  | 5-GGTCAACAAATCATAAAGATATTGG-3   | 650 bp | Lu et al., 2022        |

---

|         |   |            |            |      |                                |
|---------|---|------------|------------|------|--------------------------------|
| HCO2198 | 1 | arthropods | <i>COI</i> | 52°C | 5-TAAACTTCAGGGTGACCAAAAAATCA-3 |
|---------|---|------------|------------|------|--------------------------------|

---
